# Supplementary material for: Europium(iii) complex-based luminescent sensing probes for multi-phosphate anions: modulating selectivity by ligand choice
Source: Royal Society of Chemistry journal article supplement (doi:10.1039/b715719c), 2008-01-01

## Electronic Supplementary Information

### Europium(III) Complex-Based Luminescent Sensing Probes for Multi-phosphate Anions: Modulating Selectivity by Ligand Choice

Na Shao, Jianyu Jin, Guilan Wang, Ying Zhang, Ronghua Yang, Jingli Yuan

#### Table of Contents

#### 1. Experimental Section

- 1.1 Materials
- 1.2 Absorption spectroscopy
- 1.3 Steady-state luminescence spectroscopy and binding constants.
- 1.4 Determination of luminescence quantum yield
- 1.5  $^{31}\text{P}$  NMR.

#### 2. The Molecular Model of the Luminescent Recognition of PPI

#### 3. Spectroscopic Data

- 3.1 UV absorption spectra of  $\text{L}^1$  in different conditions.
- 3.2 Luminescence response curves of  $\text{Eu}^{3+}$  to  $\text{L}^1$ - $\text{L}^4$ .
- 3.3 Luminescence response curves of  $\text{L}^1$ - $\text{Eu}^{3+}$  to selected substrates
- 3.4 Luminescence response curves of  $\text{L}^2$ - $\text{Eu}^{3+}$  to selected substrates
- 3.5 Luminescence response curves of  $\text{L}^3$ - $\text{Eu}^{3+}$  to selected substrates
- 3.6 Luminescence response curves of  $\text{L}^4$ - $\text{Eu}^{3+}$  to selected substrates
- 3.7 Curves fitting for stoichiometric ratio and binding constant
- 3.8 Effects of CPB on the luminescence excitation and emission spectra of  $\text{L}^1$ - $\text{Eu}^{3+}$
- 3.9 Luminescence response curves of  $\text{L}^1$ - $\text{Eu}^{3+}$  to PPI in general buffer solution
- 3.10 Effects of pH
- 3.11 Binding reversibility of  $\text{L}^1$ - $\text{Eu}^{3+}$  with PPI
- 3.12  $^{31}\text{P}$  NMR
- 3.13 Emission spectra of  $\text{L}^3$ - $\text{Eu}^{3+}$  solution (dash line) and the solution containing fixed amounts of competitive substrates with increasing concentrations of PPI.
- 3.14 Hydrolysis kinetic curves of PPI at different PPase concentrations using  $\text{L}^2$ - $\text{Eu}^{3+}$  at pH 7.2.

## 1. Experimental Section

**1.1 Materials.** The tetradentate  $\beta$ -diketone derivatives,  $L^1$ - $L^4$  were synthesized by using a previous method.<sup>[S1]</sup> The compounds were confirmed by element analysis and  $^1\text{H}$  NMR.  $1.0 \times 10^{-3}$  M stock solutions of the organic ligands were prepared in ethanol. Work solutions of the ligands were obtained by diluting the stock solution with Tris/HCl buffer (pH 7.2).  $\text{EuCl}_3$  solution was prepared by dissolving  $\text{Eu}_2\text{O}_3$  in 0.01 M HCl and diluting with water. Stock solutions of 0.05 M of sodium salts of all kinds of anions were prepared by dissolving the appropriate amount of each compound in water. The aqueous solutions of all surfactants were prepared from analytical-reagent grade. Except as specified, all measurements were performed at room temperature, all other reagents were of analytical-reagent grade, and all aqueous solutions were prepared with double deionized water.

**1.2 Absorption Spectroscopy.** The UV spectroscopic titrations of the ligands with  $\text{Eu}^{3+}$  or PPI in the CPB micellar aqueous solution were undertaken in 5 mL flasks at pH 7.2. Ligand concentration was fixed and the ratio of  $\text{Eu}^{3+}$  to ligand was varying, and the corresponding UV-vis absorption spectra were recorded on a Hitachi U-3010 UV-Vis spectrophotometer (Kyoto, Japan) using quartz cells ( $1.0 \times 1.0$  cm<sup>2</sup> cross section).

**1.3 Steady-State Luminescence Spectroscopy and Binding Constants.** Steady-state luminescence spectroscopy was recorded with a Hitachi F-4500 spectrofluorometer (Kyoto, Japan). Excitation and emission slits with a nominal band pass of 10 nm were used for all measurements. The titration of  $\text{Eu}^{3+}$  with the ligand was performed using 1.0 cm path length quartz cuvettes with fixed concentration of  $\text{Eu}^{3+}$  ( $1.0 \times 10^{-6}$  M) in Tris/HCl buffer at pH 7.2 and varying the ligand amount. The luminescence emission spectra were obtained by exciting at the maximal absorption wavelength of the ligand as determined by UV spectroscopy. The association constant of the metal complex was obtained using a curve fitting procedure, operating in the Sigma plot software. Assuming a 2 : 1 of ligand (**L**)-to- $\text{Eu}^{3+}$  binding stoichiometry, according to the derivation reported previously,<sup>[S2]</sup> a response function for the ligand concentration can be given as

$$[L]^2 = \frac{1}{K} \cdot \frac{1-\alpha}{\alpha} \quad (\text{S1})$$

where  $[L]$  denotes the ligand concentration. The  $\alpha$  term is a response parameter that can be experimentally determined by measuring the  $\text{Eu}^{3+}$  luminescence intensity changes,

$$\alpha = \frac{F_{obs} - F_{init}}{F_{final} - F_{init}} \quad (S2)$$

where  $F_{obs}$  is the  $\text{Eu}^{3+}$  luminescence intensity at 612 nm in the presence of different concentrations of ligand, and  $F_{init}$  and  $F_{final}$  are the limiting values of the  $\text{Eu}^{3+}$  luminescence intensity at zero ligand concentration and at final (plateau) concentration, respectively. Combining eqs of S1 and S2, the dependence of fluorescence intensity on the L concentration is taken, allowing determination of binding constant via curve fitting.

The anion spectrofluorimetric titrations were carried out in the buffer solution by adding different concentrations of anions to the buffer solution containing the  $\text{Eu}^{3+}$  complexes in CPB. After completely mixing the components, luminescence emission spectra were obtained by exciting at the maximal absorption wavelength of the ligand as determined by UV spectroscopy. The obtained data of the luminescent intensity of  $\Delta J = 2$  manifold (centered at 612 nm) were analyzed for association constant,  $K$ , by curve fitting analysis. Assuming a  $n : 1$  of anion (X)-to- $\text{Eu}^{3+}$  binding stoichiometry, the over-all equilibrium between the  $\text{Eu}^{3+}$  ligand complex and X can be represented as following:

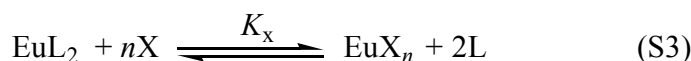

According to the derivation reported,<sup>[S2]</sup> a response function for the anion concentration can be given as

$$[\text{X}]^n = \frac{4 \cdot C_T^2 \cdot (1-\alpha)^3}{K_x \cdot \alpha} \quad (S4)$$

where  $[\text{X}]$  denotes the anion concentration,  $C_T$  is the initial concentration of  $\text{EuL}_2$  (for simpleness, charge number of anion and  $\text{Eu}^{3+}$  complexes in eqs of S3 and S4 are omitted). The  $\alpha$  term is a response parameter that can be experimentally determined by measuring the  $\text{Eu}^{3+}$  luminescence intensity changes,

$$\alpha = \frac{F_{obs} - F_{final}}{F_{init} - F_{final}} \quad (S5)$$

where  $F_{obs}$  is the  $\text{Eu}^{3+}$  luminescence intensity at 612 nm in the presence of different concentrations of anion, and  $F_{init}$  and  $F_{final}$  are the limiting values of the  $\text{Eu}^{3+}$  luminescence intensity at zero anion concentration and at final (plateau) anion concentration, respectively. Combining eqs of S4 and S5 the dependence of luminescence intensity on the anion concentration is taken, allowing determination of stoichiometric ratio and binding constant via curve fitting (see below).

**1.4 Determination of Luminescence Quantum Yield ( $\Phi$ ):** For measurement of the quantum yields of the europium complexes, the complex solutions at pH 7.2 was adjusted to an absorbance of  $\sim 0.05$ . The emission spectra were recorded with the excitation wavelength of 335 nm, and the integrated areas of the

luminescence corrected spectra were measured. The quantum yields were then calculated by comparison with quinine sulfate as reference using the following equation,<sup>[S3]</sup>

$$\Phi = \frac{I}{I_R} \cdot \frac{A_R}{A} \cdot \left(\frac{n}{n_R}\right)^2 \cdot \Phi_R \quad (\text{S6})$$

where  $\Phi$  is the quantum yield,  $I$  is the integrated area under the luminescence spectra.  $A$  is the absorbance,  $n$  is the refractive index of the solvent, and  $R$  refers to the reference fluorophore, quinine sulfate.  $\Phi_R = 0.56$  in 0.1M sulfuric acid was used as the reference quantum yield.<sup>[S4]</sup>

**1.5  $^{31}\text{P}$  NMR.** The  $^{31}\text{P}$  NMR spectra were obtained with an Invoa-400 (Invoa 400, 400 MHz) spectrometer at 298 K. The samples were placed into a 4 mm broadband/ $^1\text{H}$  dual-frequency magic-angle-spinning probehead and the spectra were acquired at 400 MHz. The chemical shifts were referenced relative to external  $\text{H}_3\text{PO}_4$  85% (0 ppm).

## References

[S1] J. Yuan, K. Matsumoto, H. Kimura, *Anal. Chem.*, 1998, **70**, 596-601; F. B. Wu, C. Zhang, *Anal. Biochem.*, 2002, **311**, 57-67.

[S2] Y. Zhang, R. H. Yang, F. Liu, K. A. Li, A. *Anal. Chem.*, 2004, **76**, 7336-7345.

[S3] S. Aromori, M. L. Bell, C. S. Oh, K. A. Frimat, T. D. James, *J. Chem. Soc., Perin, Trans. 1*, 2002, 803-808; M. Onoda, S. Uchiyama, T. Santa, K. Imai, *Anal. Chem.*, 2002, **74**, 4089-4096.

[S4] W. H. Melhuish, *J. Sci. Technol. B*, 1955, **37**, 142-149.

## 2. The Molecular Model of the Luminescent Recognition of PPI

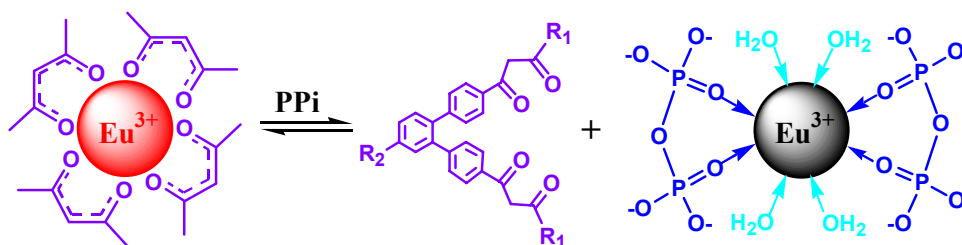

### 3. Spectroscopic Data

**3.1** UV absorption spectra of  $5.0 \times 10^{-6}$  M  $L^1$  in  $5.0 \times 10^{-5}$  M CPB micellar solutions at pH 7.2: (a)  $L^1$  alone, (b)  $L^1 + Eu^{3+}$ , (c)  $L^1 + Eu^{3+} + PPI$ .  $[Eu^{3+}] = 2.5 \times 10^{-6}$  M and  $[PPI] = 5.0 \times 10^{-6}$  M.

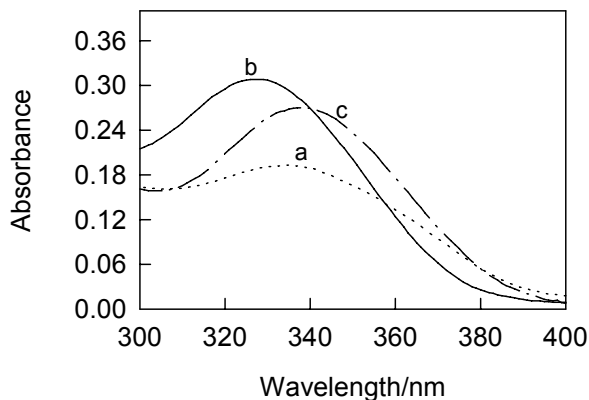

**3.2** Luminescence emission spectra of  $1.0 \times 10^{-6}$  M  $Eu^{3+}$  ( $\lambda_{ex}=335$  nm) in  $5.0 \times 10^{-5}$  M CPB in the presence of different concentrations of  $L^1$ - $L^4$ .

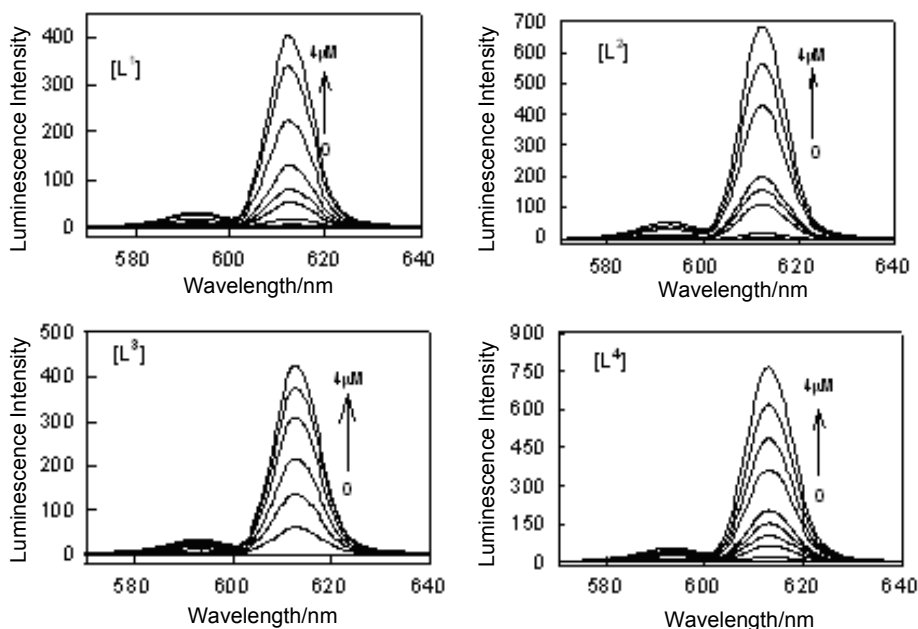

**3.3** Luminescence responses of  $L^1$ - $Eu^{3+}$  in  $5.0 \times 10^{-5}$  M CPB to selected substrates.  $[Eu^{3+}] = 1.0 \times 10^{-6}$  M,  $[L^1] = 2.0 \times 10^{-6}$  M. The arrows indicate the signal changes as increasing in the anion concentration.

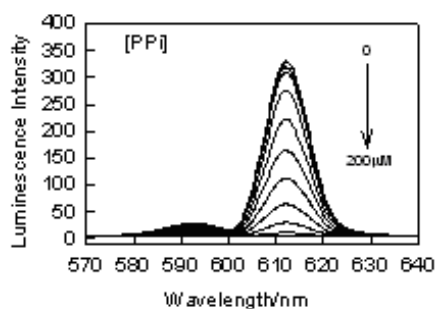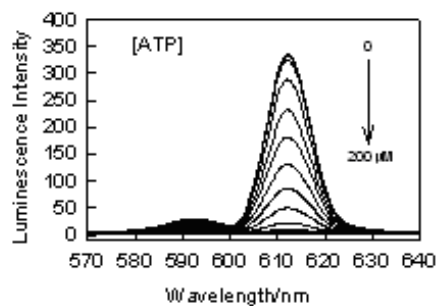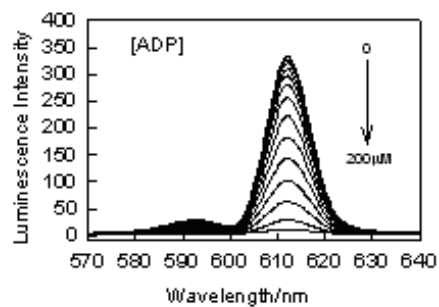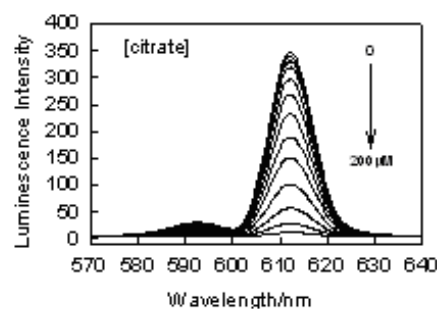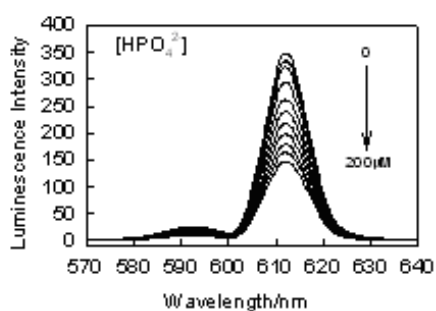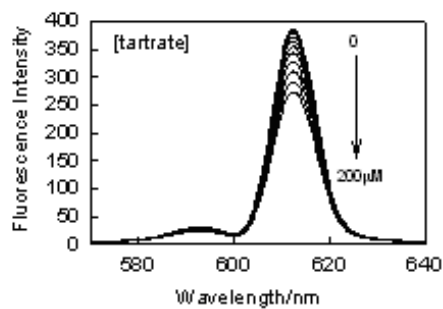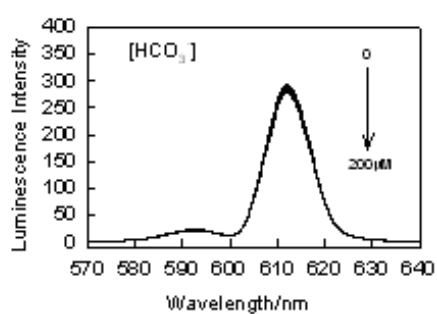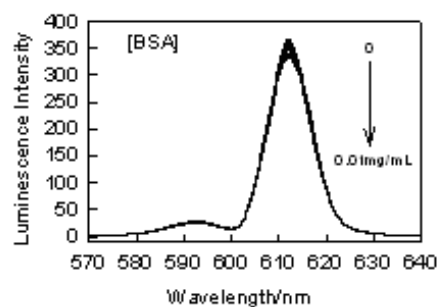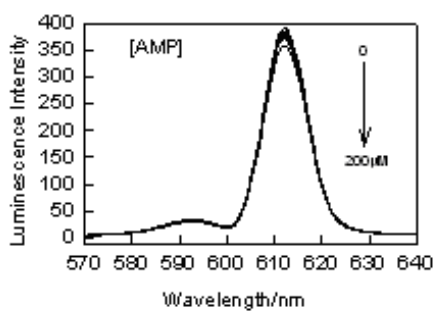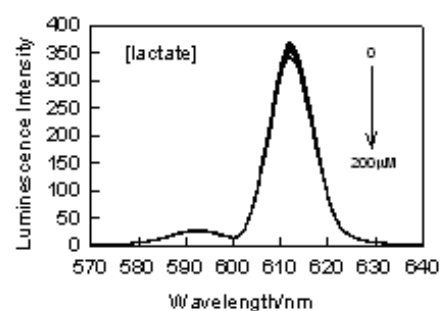

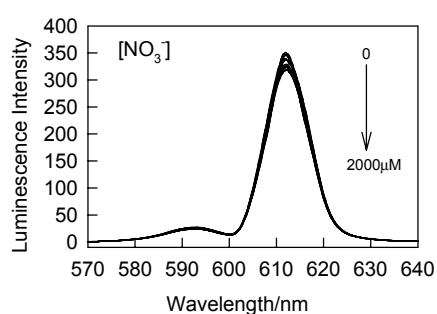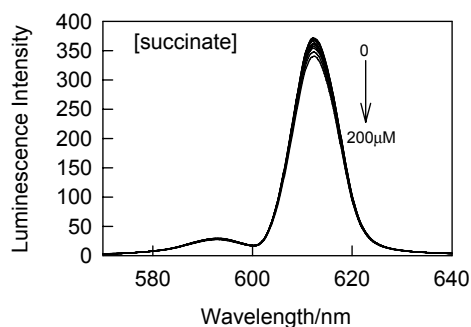

**3.4 Luminescence responses of L<sup>2</sup>-Eu<sup>3+</sup> in 5.0 × 10<sup>-5</sup> M CPB to selected substrates. [Eu<sup>3+</sup>] = 1.0 × 10<sup>-6</sup> M, [L<sup>2</sup>] = 2.0 × 10<sup>-6</sup> M. The arrows indicate the signal changes as increasing in the anion concentration.**

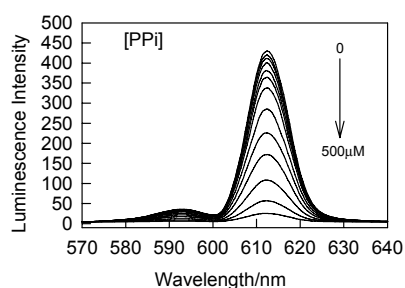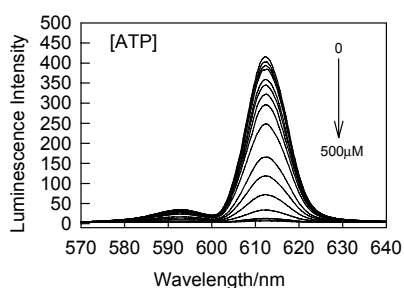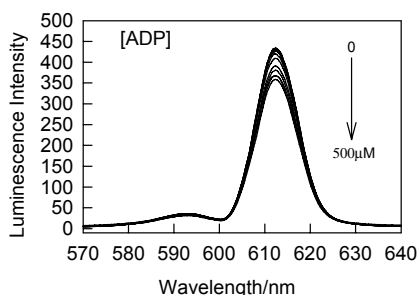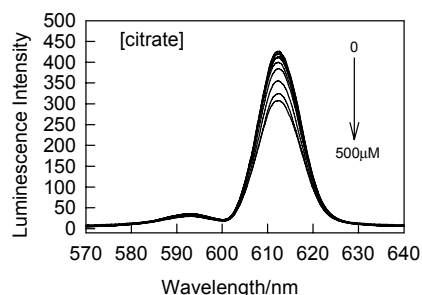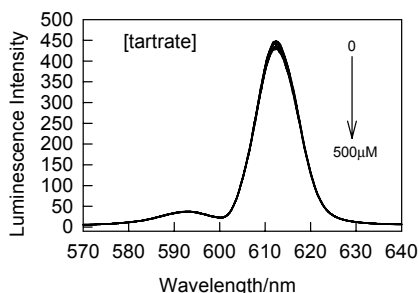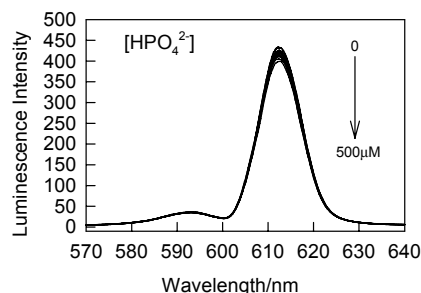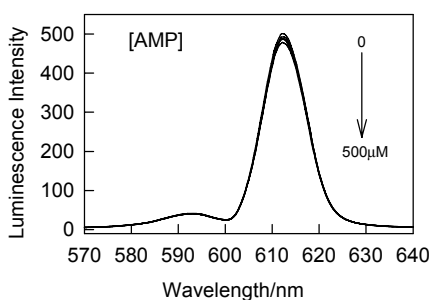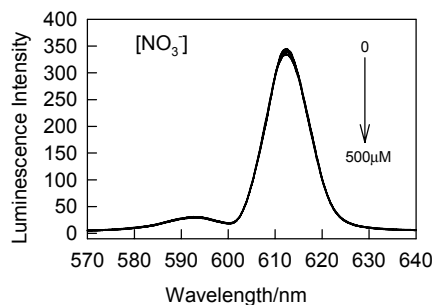

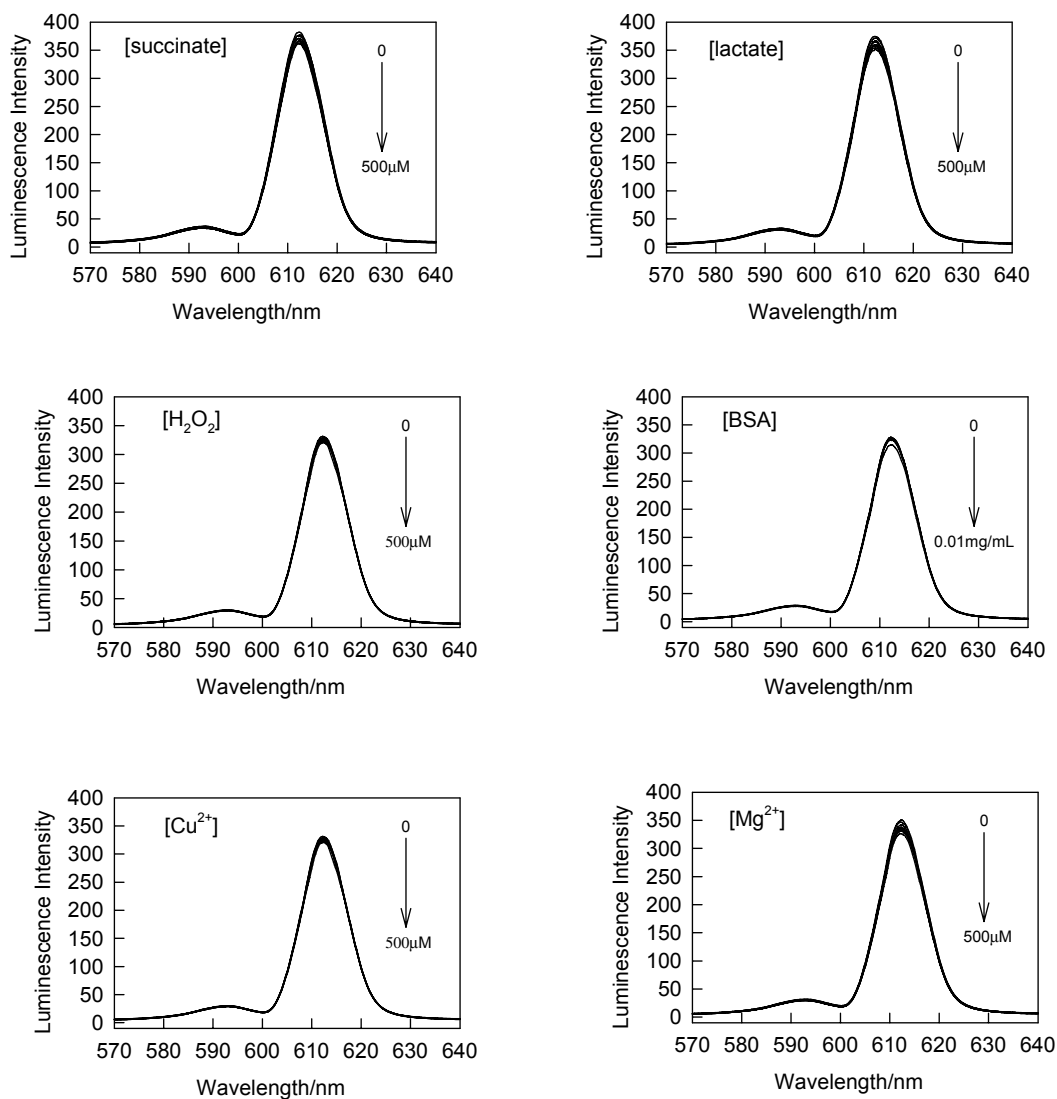

**3.5** Luminescence responses of  $L^3-Eu^{3+}$  in  $5.0 \times 10^{-5}$  M CPB to selected substrates.  $[Eu^{3+}] = 1.0 \times 10^{-6}$  M,  $[L^3] = 2.0 \times 10^{-6}$  M. The arrows indicate the signal changes as increasing in the anion concentration.



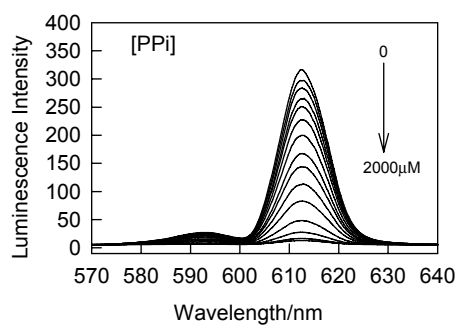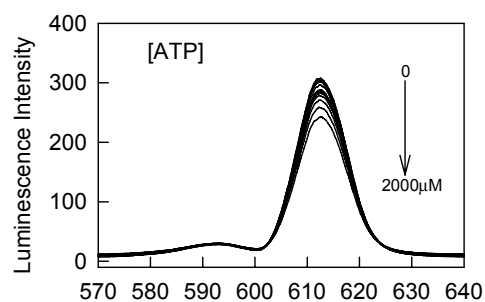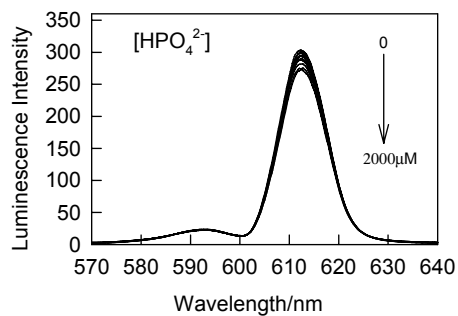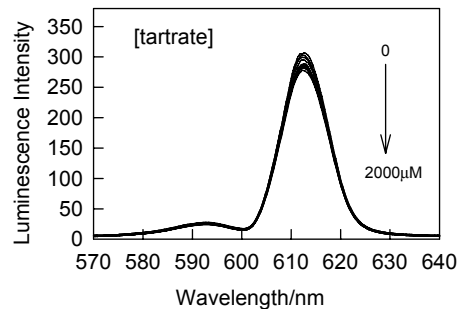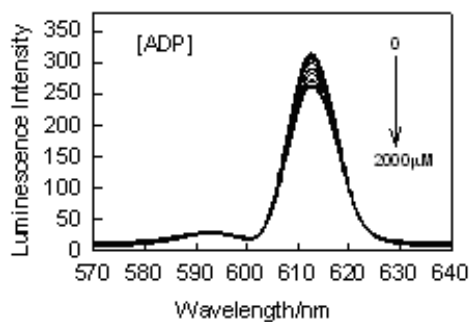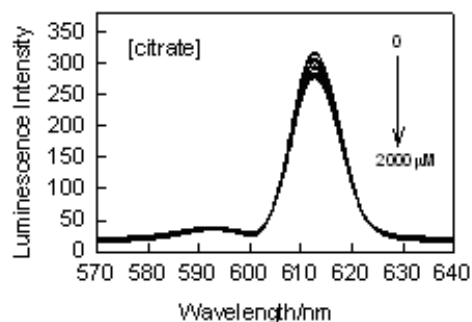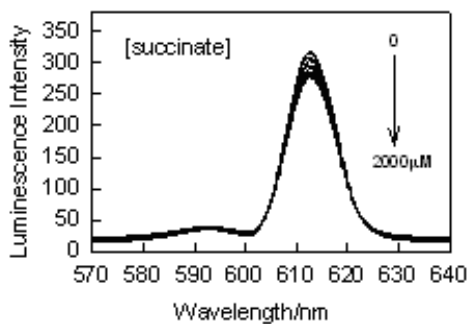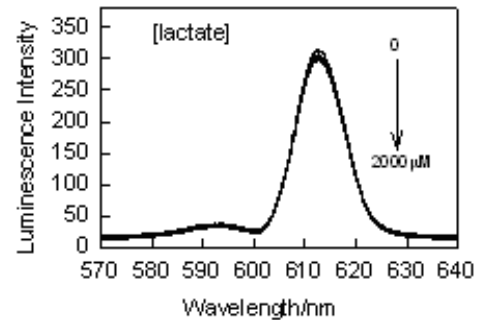

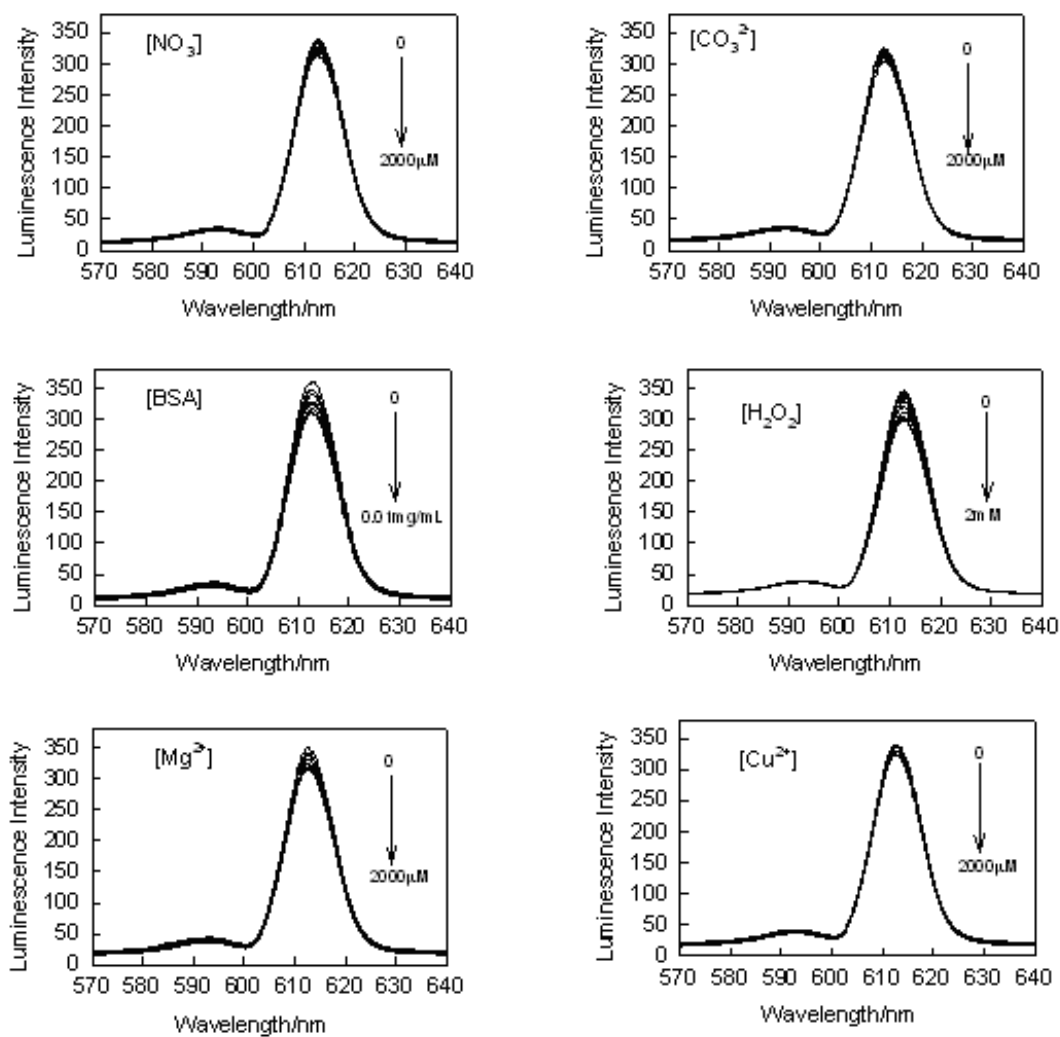

**3. 6** Luminescence responses of  $L^4$ - $Eu^{3+}$  in  $5.0 \times 10^{-5}$  M CPB to selected substrates.  $[Eu^{3+}] = 1.0 \times 10^{-6}$  M,  $[L^4] = 2.0 \times 10^{-6}$  M. The arrows indicate the signal changes as increasing in the anion concentration.

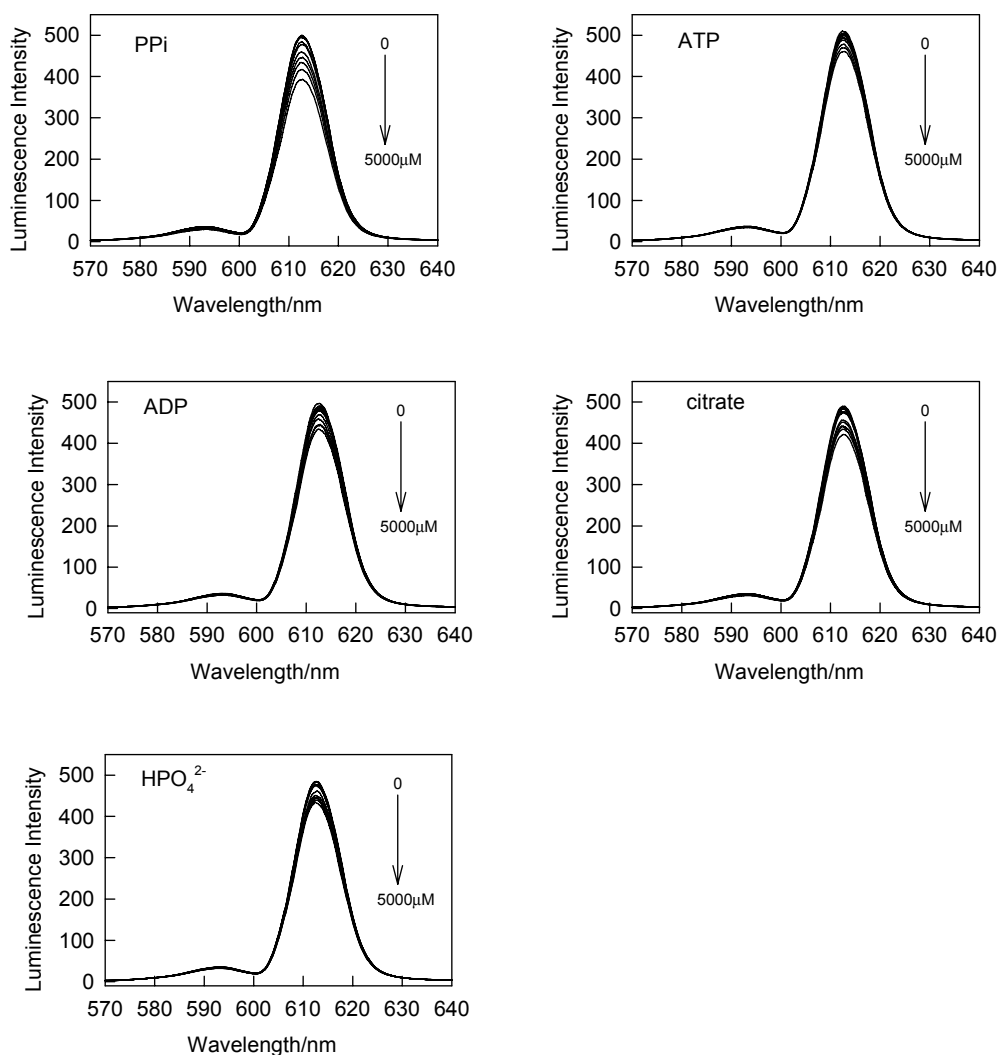

**3.7** Response parameter values ( $\alpha$ ) as a function of the logarithm of PPI concentrations at pH 7.2. Theoretical response of PPI was predicted by eqs. (S4) and (S5). The experimental data ( $\bullet$ ) were fitted to the equation with the different complex ratios and binding constants. The curve referring to  $n = 2$  and  $\log K = 13.63$  is the best one fitted to the experimental data.

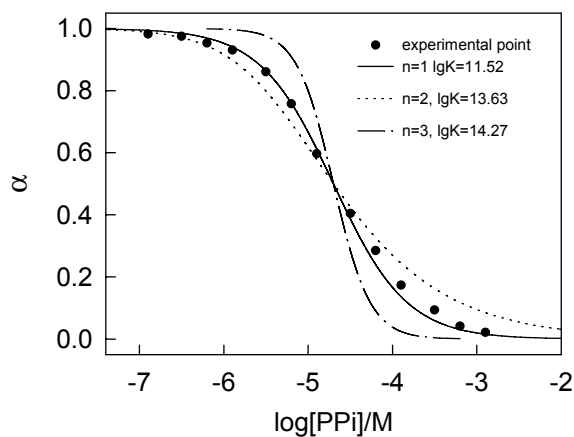

**3.8** Luminescence excitation spectra ( $\lambda_{em} = 612 \text{ nm}$ ) and emission spectra ( $\lambda_{ex} = 335 \text{ nm}$ ) of Tris/HCl buffer solutions containing  $L^1\text{-Eu}^{3+}$  ( $[\text{Eu}^{3+}] = 1.0 \times 10^{-6} \text{ M}$ ,  $[L^1] = 2.0 \times 10^{-6} \text{ M}$ ) in the absence and presence of  $5.0 \times 10^{-5} \text{ M}$  CPB.

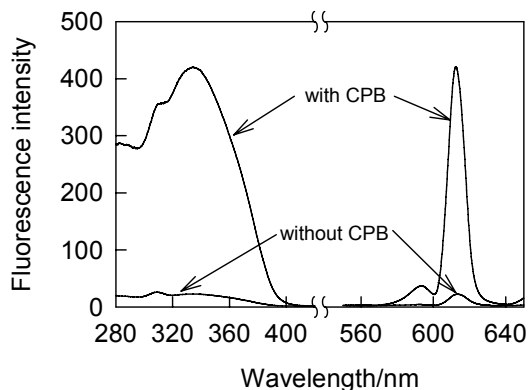

**3. 9** Luminescence response of  $L^1\text{-Eu}^{3+}$  ( $[\text{Eu}^{3+}] = 1.0 \times 10^{-6} \text{ M}$ ,  $[L^1] = 2.0 \times 10^{-6} \text{ M}$ ) to different concentrations of PPI in Tris/HCl buffer solutions at pH 7.2 in the absence of surfactant.

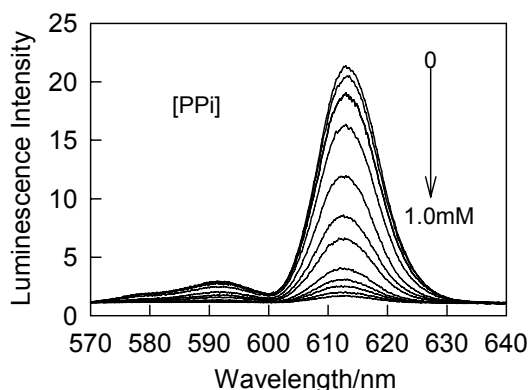

**3.10** Luminescence intensity-pH profiles for titrations of the buffered-CPB solution containing  $1.0 \times 10^{-6} \text{ M}$   $\text{Eu}^{3+}$  and  $2.0 \times 10^{-6} \text{ M}$   $L^3$  in the absence (a) and the presence (b) of  $1.0 \times 10^{-5} \text{ M}$  PPI. The excitation was at 334 nm, and emission was recorded at 612 nm.

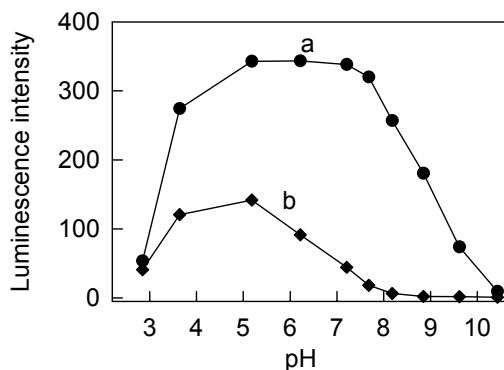

**3. 11** Luminescence emission spectra of  $L^1\text{-Eu}^{3+}$  in: (a) CPB micelles, (b) (a) +  $1.0 \times 10^{-5} \text{ M}$  PPI, and (c) (b)

$+ 2.0 \times 10^{-6} \text{ M L}^4$ .  $[\text{L}^1] = 2.0 \times 10^{-6} \text{ M}$ ,  $[\text{Eu}^{3+}] = 1.0 \times 10^{-6} \text{ M}$ .  $\lambda_{\text{ex}} = 335 \text{ nm}$ .

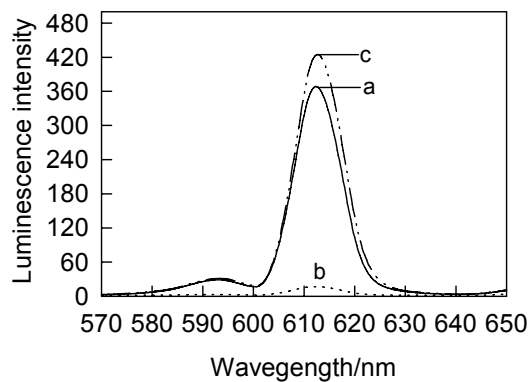

**3.12**  $^{31}\text{P}$  NMR of PPI alone (a), PPI +  $\text{Eu}^{3+}$  (b), and  $\text{L}^3 + \text{Eu}^{3+} + \text{PPI}$  (c)

a)

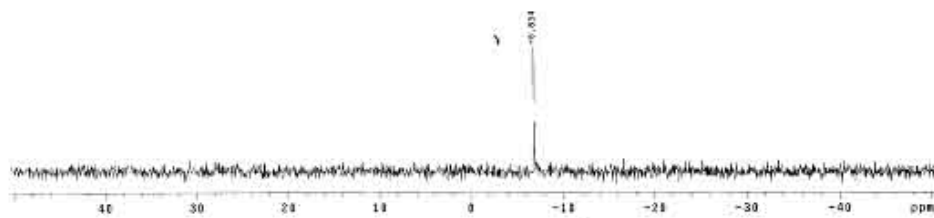

b)

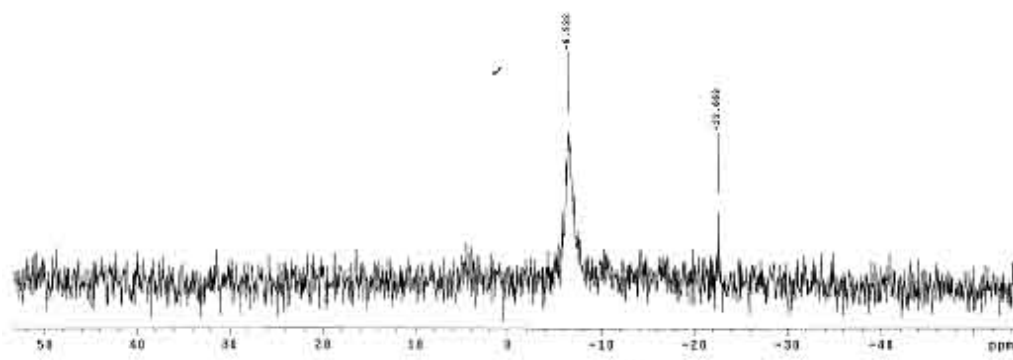

c)

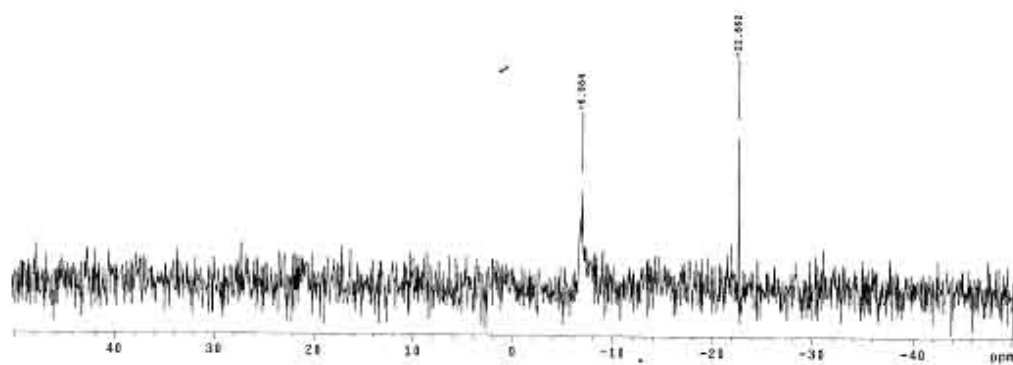

**3.13.** Emission spectra of  $L^3$ -Eu<sup>3+</sup> solution (dash line) and the solution containing fixed amounts of competitive substrates with increasing concentrations of PPI (0, 0.05, 0.1, 0.2, 0.5, 1.0, 2.0, 5.0, 10, 20, 50, 100, 200, 400, and 600  $\mu$ M).  $\lambda_{ex} = 334$  nm.

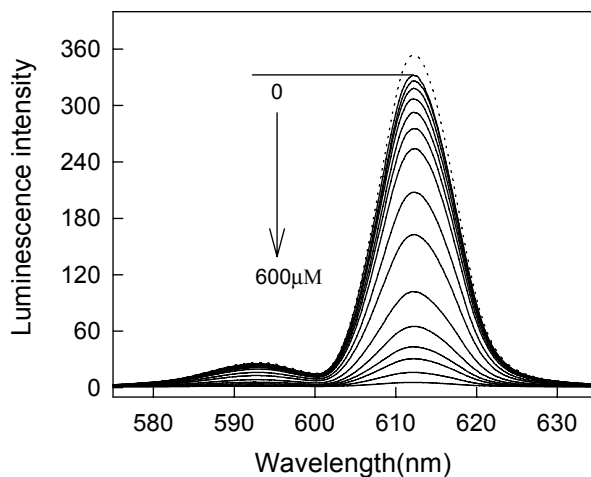

**3.14.** Hydrolysis kinetic curves of PPI at different PPase concentrations using  $L^2$ -Eu<sup>3+</sup> at pH 7.2: (a) 0.3 units; (b) 0.6 units; (c) 1.8 units; (d) 3.6 units; (e) 5.4 units; and (f) 7.2 units.  $\lambda_{ex} = 334$  nm,  $\lambda_{em} = 612$  nm.

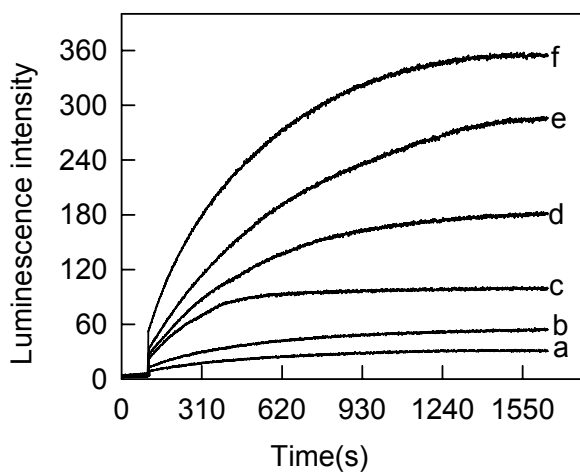

Supplement: b715719c.pdf [file b715719c.pdf]
